# Supplementary material
Source: PubMed Central journal article supplement (PMC3625375)
Supplement: NIHMS425675-supplement-1.pdf [file NIHMS425675-supplement-1.pdf]

**Supplementary information for:**

**An integrated transcriptomic and functional genomic approach identifies a type I interferon signature as a host defense mechanism against *Candida albicans* in humans**

Sanne P. Smeekens, Aylwin Ng, Vinod Kumar, Melissa D. Johnson, Theo S. Plantinga, Cleo van Diemen, Mark S. Gresnigt, Karin Fransen, Suzanne van Sommeren, Marije Oosting, Shih-Chin Cheng, Leo A.B. Joosten, William K. Scott, John R. Perfect, Jos W.M. van der Meer, Cisca Wijmenga, Mihai G. Netea, and Ramnik J. Xavier

Supplementary Figure S1 K-means clustered analysis (1-11)

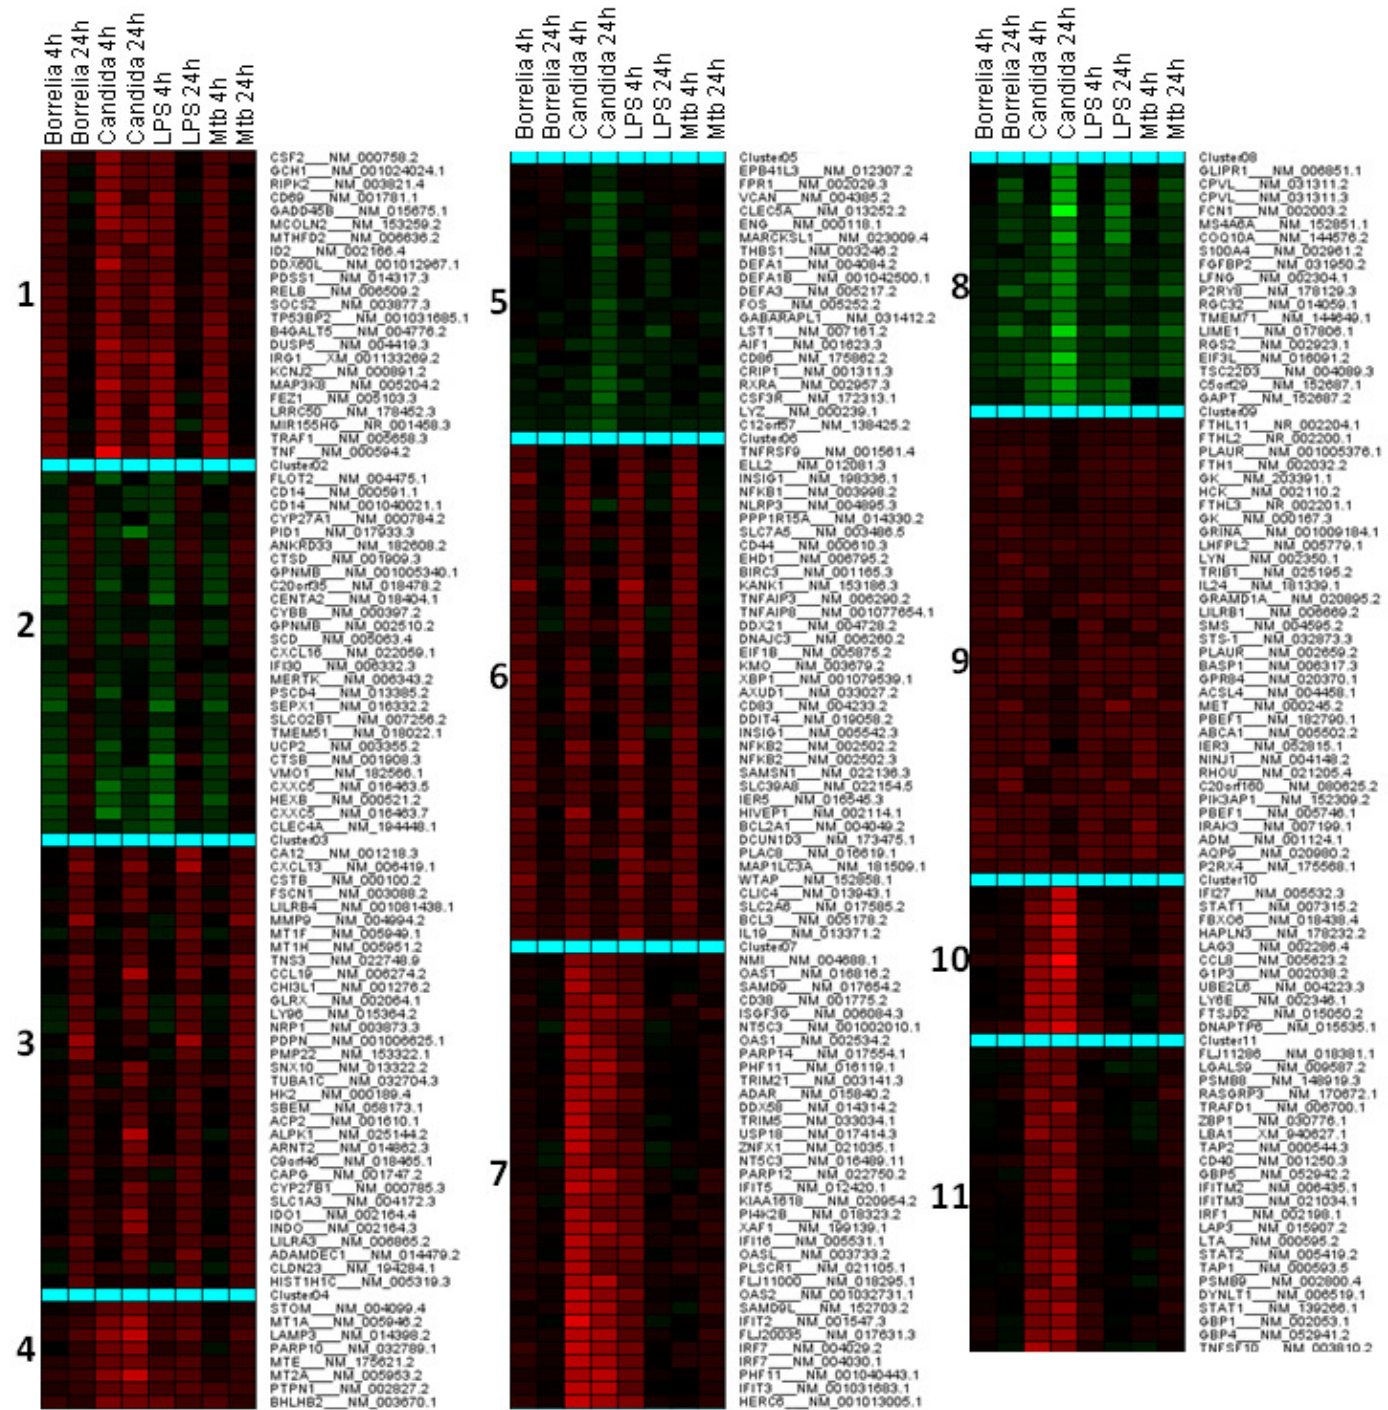

Supplementary Figure S1. K-means cluster analysis of transcriptional responses to *Candida*. An expanded view of expression profiles clusters 1-11 shown in Figure 1, describing responses to stimulation with *Borrelia burgdorferi*, *Candida albicans*, *E.coli*-derived LPS, and *Mycobacterium tuberculosis* (M.tb) is displayed.

Supplementary Figure S2 K-means clustered analysis (12-27)

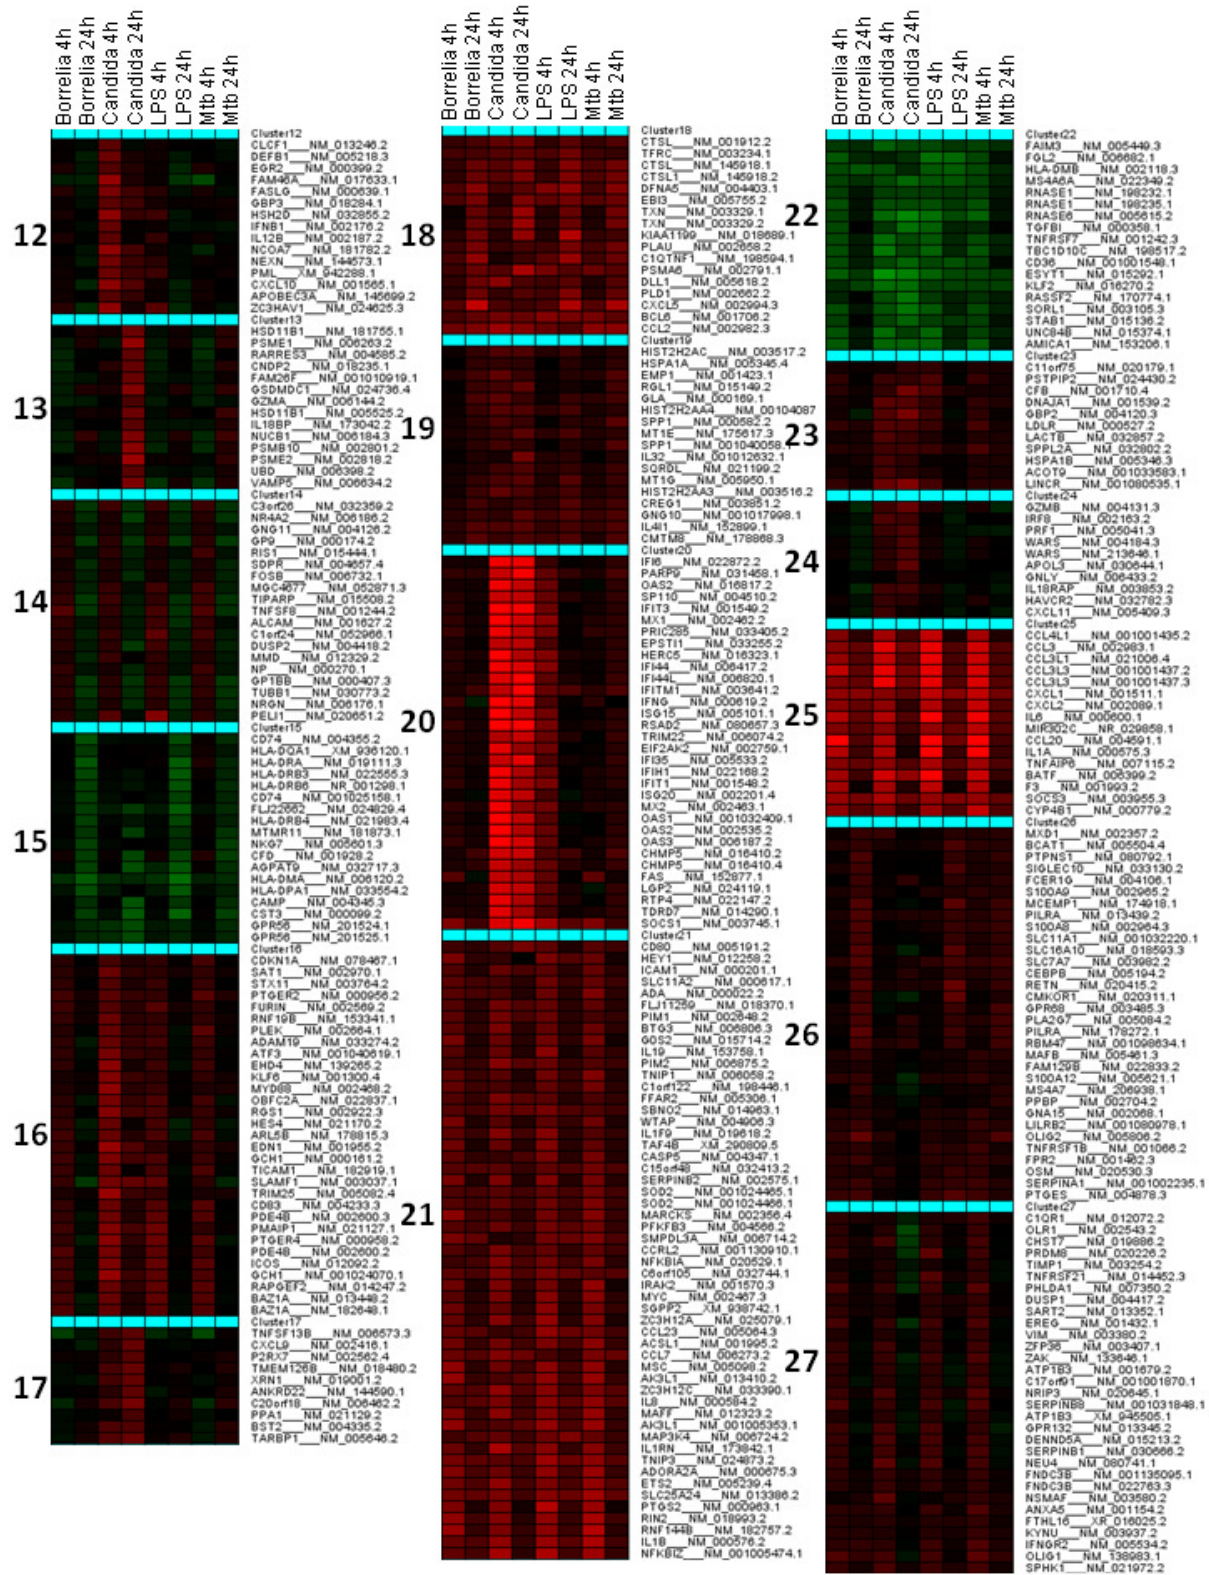

Supplementary Figure S2. K-means cluster analysis of transcriptional responses to *Candida*. An expanded view of expression profiles clusters 12-27 shown in Figure 1, describing responses to stimulation with *Borrelia burgdorferi*, *Candida albicans*, *E.coli*-derived LPS, and *Mycobacterium tuberculosis* (M.tb) is displayed.

Supplementary Figure S3 K-means clustered analysis (28-30)

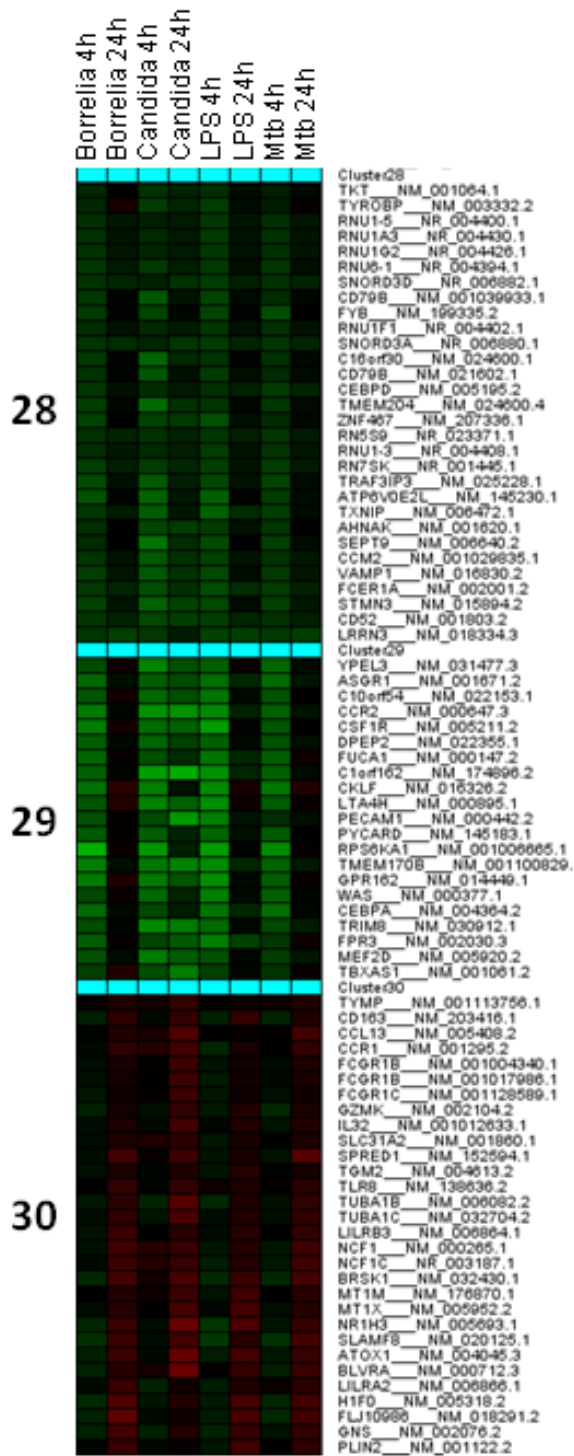

**Supplementary Figure S3.** K-means cluster analysis of transcriptional responses to Candida. An expanded view of expression profiles clusters 28-30 shown in Figure 1, describing responses to stimulation with *Borrelia burgdorferi*, *Candida albicans*, *E.coli*-derived LPS, and *Mycobacterium tuberculosis* (M.tb) is displayed.

**Supplementary Figure S4** Correlation plots for cytokines versus corresponding stimuli.

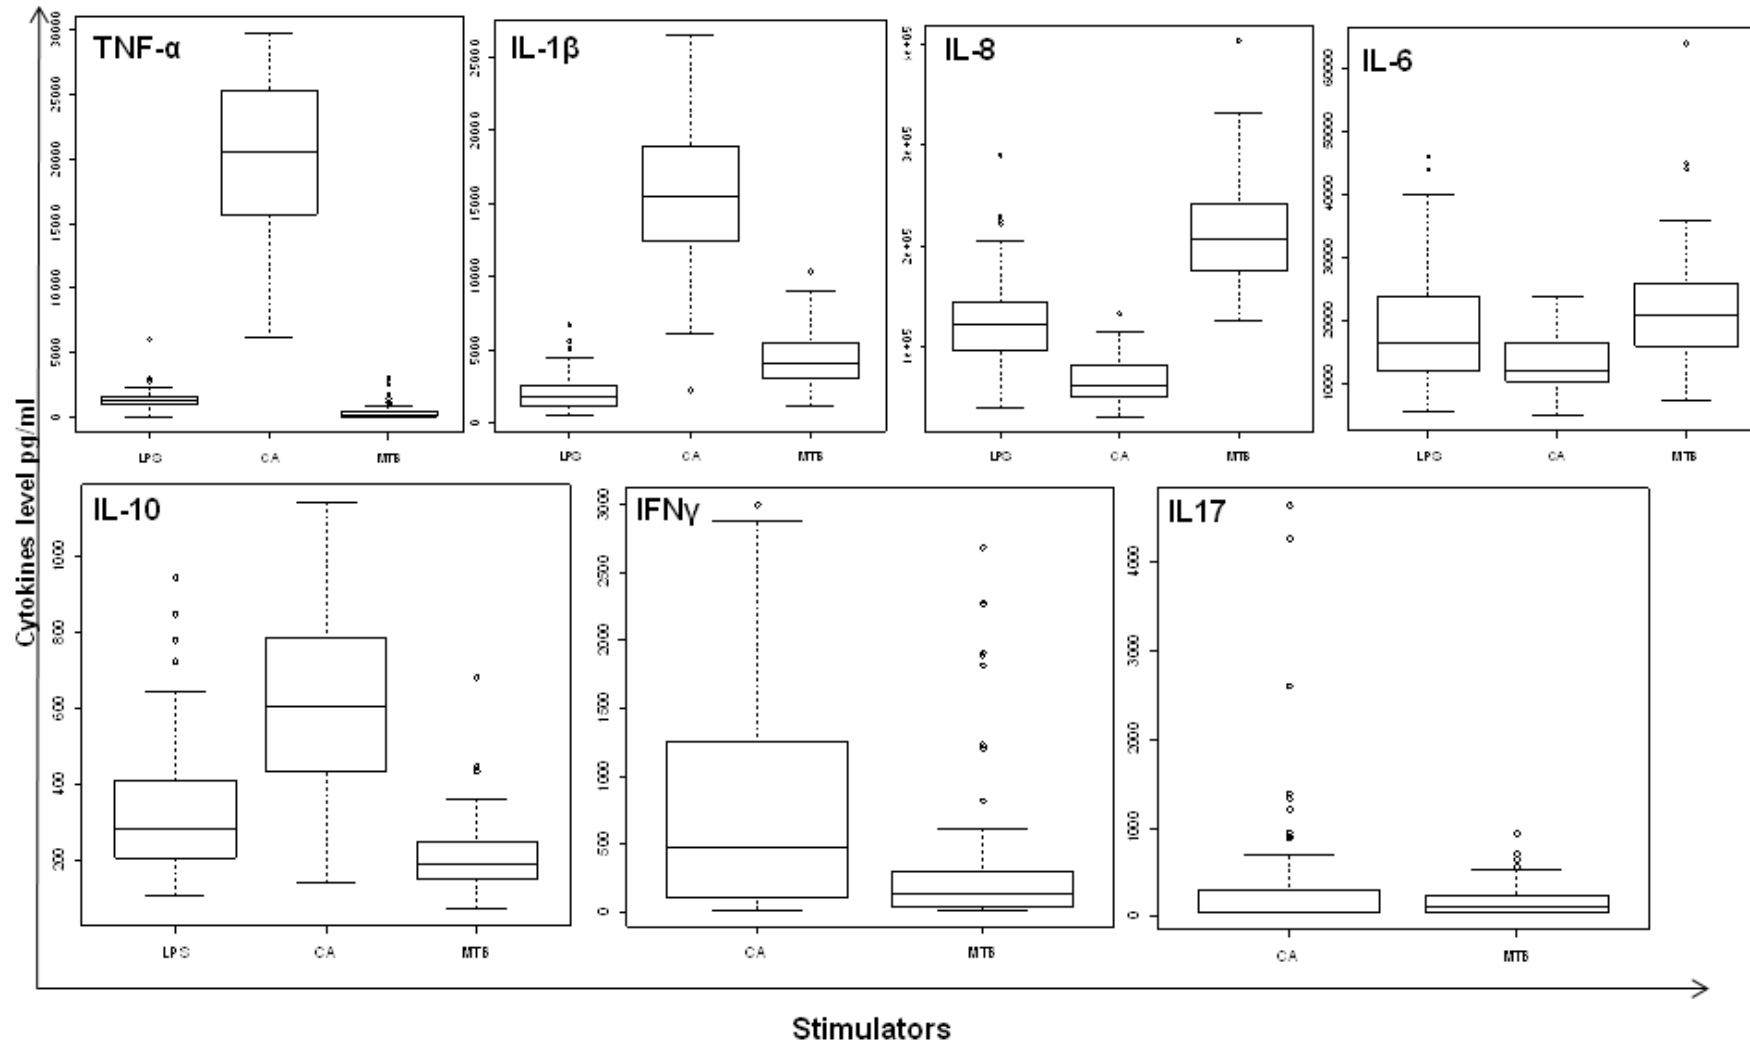

**Supplementary Figure S4.** In contrast to other microbial stimuli such as LPS and MTB, *C. albicans* induced higher levels of TNF- $\alpha$ , IL-1 $\beta$  and IL-10 production, and lower levels of IL-8 and IL-6 in human PBMCs. Boxplots represent median  $\pm$  interquartile range.

**Supplementary Figure S5** Correlation plots for all cytokines and SNP polymorphisms

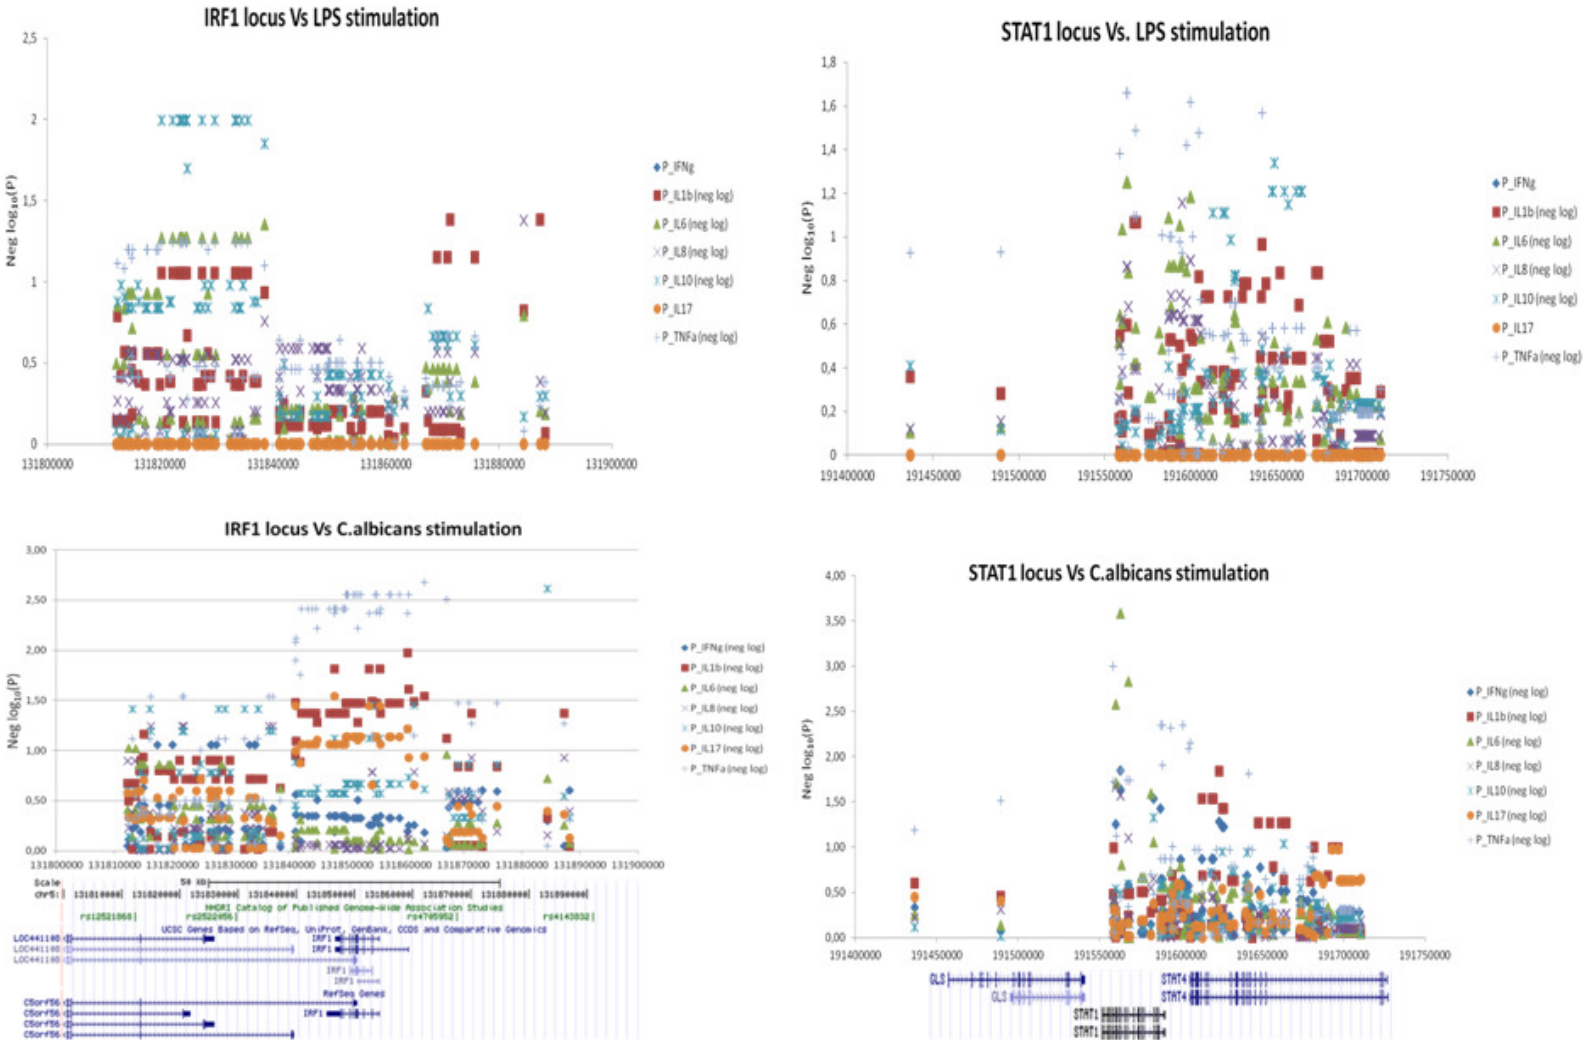

**Supplementary Figure S5.** Consistent with the specificity of the type I IFN pathway for *Candida* stimulation, the association was significant with cytokine levels induced by *Candida*, but not by LPS or MTB stimulation.

### Supplementary Figure S6

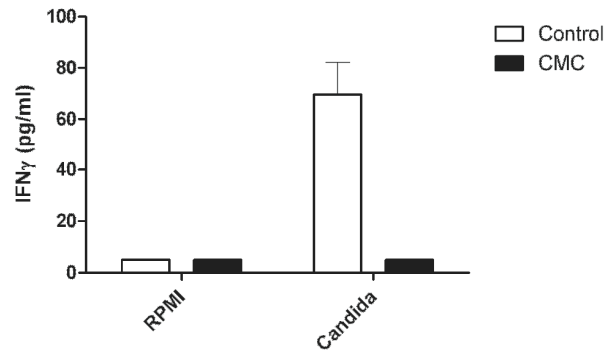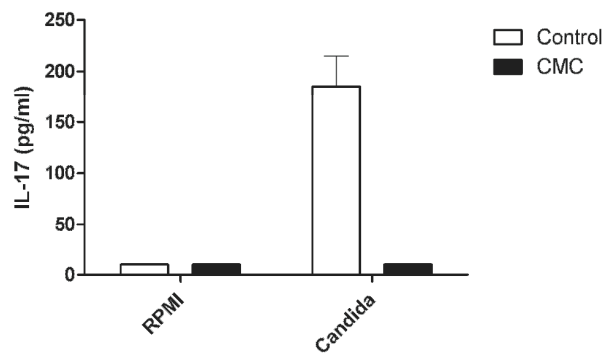

**Supplementary Figure S6.** Defective Th1 and Th17 development in DC/T-cell cocultures from CMC patients harboring a gain of function mutation in STAT1. Bars represent mean  $\pm$  SEM.

**Supplementary Figure S7** Multidimensional scaling (MDS) analysis: genetic background in Candidemia cohort

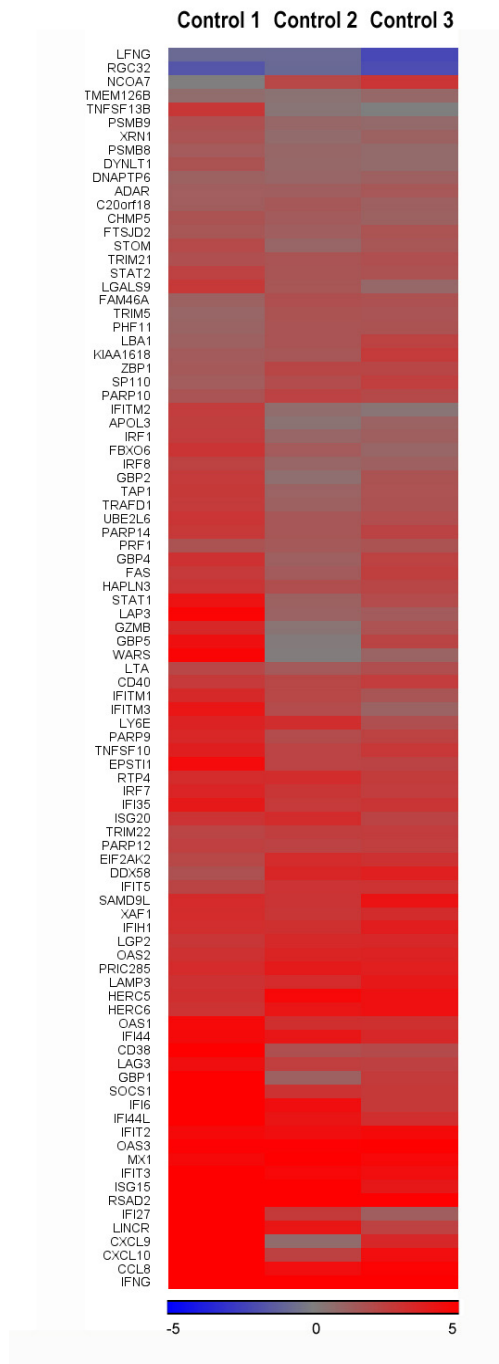

**Supplementary Figure S7.** Heatmap showing the differential expression for 91 genes as a response to *c. albicans* stimulation in cells from healthy controls. This compares the fold change genes expression levels of 91 genes in *in vitro* stimulated vs. unstimulated cells (*Candida Albicans*). The scale of this heatmap is given as log<sub>2</sub> fold change with a range from -5 (blue) to +5 (red).



**Supplementary Figure S8** Multidimensional scaling (MDS) analysis: genetic background in Candidemia cohort

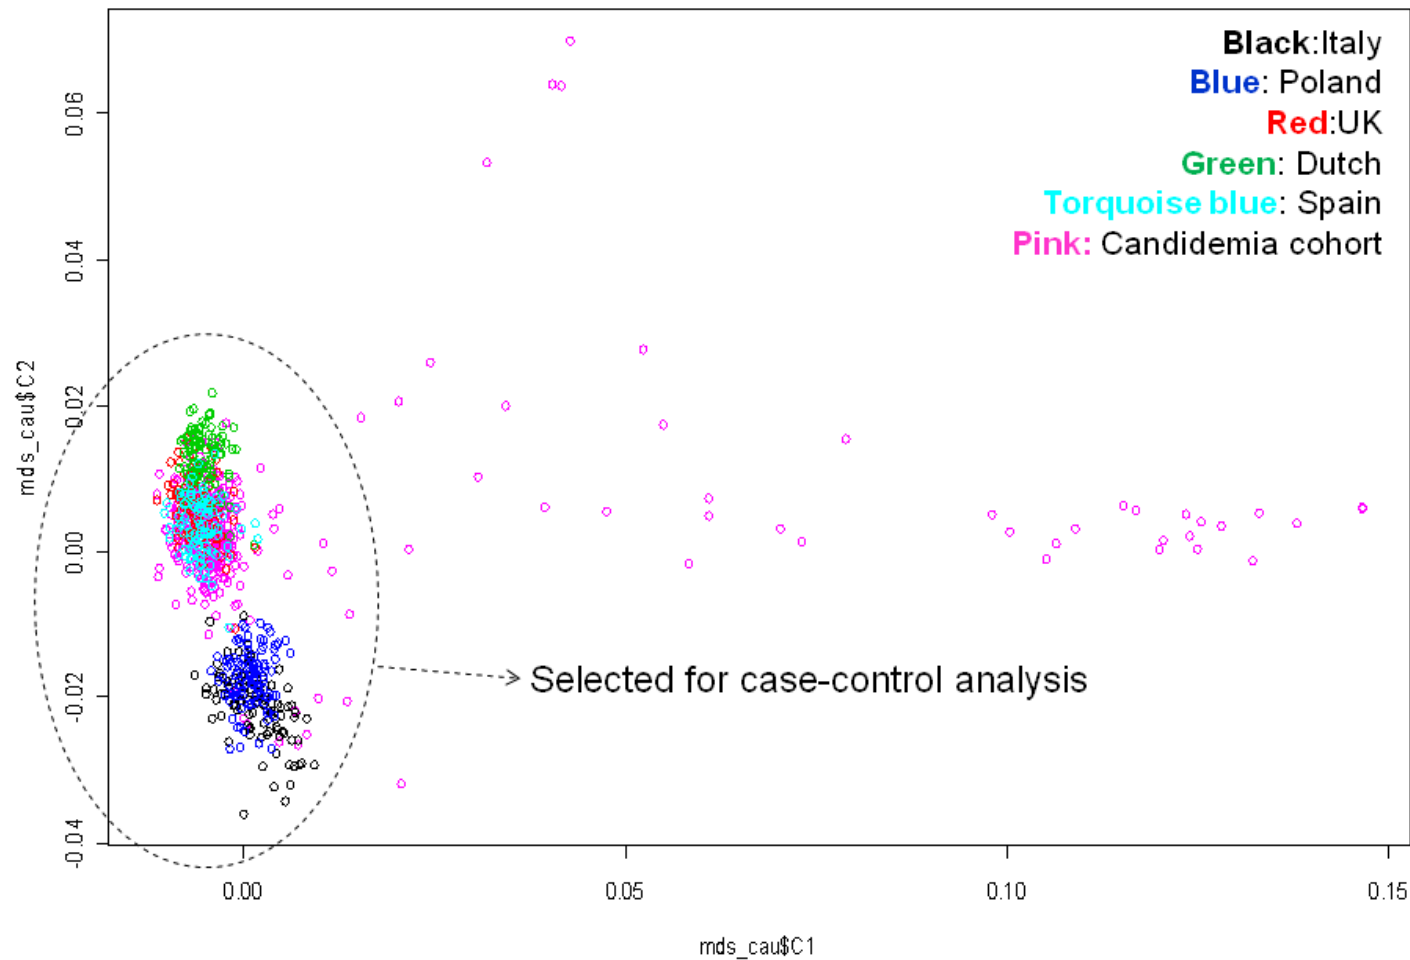

**Supplementary Figure S8.** The multidimensional scaling (MDS) analysis (implemented in PLINK, MDS on the  $N \times N$  matrix of genome-wide IBS pairwise distances) was performed on individuals from Candidemia cohort (pink colour) by including healthy control samples of known ethnicity as reference. Only samples which overlap with the known ethnic populations were included (shown within dashed lines) and outliers ( $n=40$ ) were excluded from further case-control analysis.

**Supplementary Table S1. Candida-response signature**

| <b>ProfileSummary</b> | <b>UniqueID</b>       | <b>Symbol</b> | <b>RefSeq</b> |
|-----------------------|-----------------------|---------------|---------------|
| <b>Down</b>           | LFNG__NM_002304.1     | LFNG          | NM_2304.1     |
| <b>Down</b>           | RGC32__NM_014059.1    | RGC32         | NM_14059.1    |
| <b>Up</b>             | STOM__NM_004099.4     | STOM          | NM_4099.4     |
| <b>Up</b>             | TNFSF13B__NM_006573.3 | TNFSF13B      | NM_6573.3     |
| <b>Up</b>             | FAM46A__NM_017633.1   | FAM46A        | NM_17633.1    |
| <b>Up</b>             | PRF1__NM_005041.3     | PRF1          | NM_5041.3     |
| <b>Up</b>             | GZMB__NM_004131.3     | GZMB          | NM_4131.3     |
| <b>Up</b>             | TMEM126B__NM_018480.2 | TMEM126B      | NM_18480.2    |
| <b>Up</b>             | CD40__NM_001250.3     | CD40          | NM_1250.3     |
| <b>Up</b>             | HAPLN3__NM_178232.2   | HAPLN3        | NM_178232.2   |
| <b>Up</b>             | LTA__NM_000595.2      | LTA           | NM_595.2      |
| <b>Up</b>             | IRF8__NM_002163.2     | IRF8          | NM_2163.2     |
| <b>Up</b>             | XRN1__NM_019001.2     | XRN1          | NM_19001.2    |
| <b>Up</b>             | KIAA1618__NM_020954.2 | KIAA1618      | NM_20954.2    |
| <b>Up</b>             | NCOA7__NM_181782.2    | NCOA7         | NM_181782.2   |
| <b>Up</b>             | PSMB9__NM_002800.4    | PSMB9         | NM_2800.4     |
| <b>Up</b>             | IFI27__NM_005532.3    | IFI27         | NM_5532.3     |
| <b>Up</b>             | SOCS1__NM_003745.1    | SOCS1         | NM_3745.1     |
| <b>Up</b>             | IRF1__NM_002198.1     | IRF1          | NM_2198.1     |
| <b>Up</b>             | DYNLT1__NM_006519.1   | DYNLT1        | NM_6519.1     |
| <b>Up</b>             | FAS__NM_152877.1      | FAS           | NM_152877.1   |
| <b>Up</b>             | CXCL9__NM_002416.1    | CXCL9         | NM_2416.1     |
| <b>Up</b>             | LINCR__NM_001080535.1 | LINCR         | NM_1080535.1  |
| <b>Up</b>             | IFNG__NM_000619.2     | IFNG          | NM_619.2      |
| <b>Up</b>             | CD38__NM_001775.2     | CD38          | NM_1775.2     |
| <b>Up</b>             | LGALS9__NM_009587.2   | LGALS9        | NM_9587.2     |
| <b>Up</b>             | APOL3__NM_030644.1    | APOL3         | NM_30644.1    |
| <b>Up</b>             | PSMB8__NM_148919.3    | PSMB8         | NM_148919.3   |
| <b>Up</b>             | LAMP3__NM_014398.2    | LAMP3         | NM_14398.2    |
| <b>Up</b>             | LBA1__XM_940627.1     | LBA1          | XM_940627.1   |
| <b>Up</b>             | LAG3__NM_002286.4     | LAG3          | NM_2286.4     |
| <b>Up</b>             | ZBP1__NM_030776.1     | ZBP1          | NM_30776.1    |
| <b>Up</b>             | TRIM5__NM_033034.1    | TRIM5         | NM_33034.1    |
| <b>Up</b>             | FLJ11286__NM_018381.1 | FLJ11286      | NM_18381.1    |
| <b>Up</b>             | PARP10__NM_032789.1   | PARP10        | NM_32789.1    |
| <b>Up</b>             | C20orf18__NM_006462.2 | C20orf18      | NM_6462.2     |
| <b>Up</b>             | IFITM2__NM_006435.1   | IFITM2        | NM_6435.1     |
| <b>Up</b>             | IFITM3__NM_021034.1   | IFITM3        | NM_21034.1    |
| <b>Up</b>             | CHMP5__NM_016410.2    | CHMP5         | NM_16410.2    |
| <b>Up</b>             | CHMP5__NM_016410.4    | CHMP5         | NM_16410.4    |
| <b>Up</b>             | TRAFD1__NM_006700.1   | TRAFD1        | NM_6700.1     |
| <b>Up</b>             | WARS__NM_004184.3     | WARS          | NM_4184.3     |
| <b>Up</b>             | FLJ11000__NM_018295.1 | FLJ11000      | NM_18295.1    |

|    |                       |          |              |
|----|-----------------------|----------|--------------|
| Up | TRIM21__NM_003141.3   | TRIM21   | NM_3141.3    |
| Up | DDX58__NM_014314.2    | DDX58    | NM_14314.2   |
| Up | TNFSF10__NM_003810.2  | TNFSF10  | NM_3810.2    |
| Up | CCL8__NM_005623.2     | CCL8     | NM_5623.2    |
| Up | CXCL10__NM_001565.1   | CXCL10   | NM_1565.1    |
| Up | PARP14__NM_017554.1   | PARP14   | NM_17554.1   |
| Up | DNAPTP6__NM_015535.1  | DNAPTP6  | NM_15535.1   |
| Up | LAP3__NM_015907.2     | LAP3     | NM_15907.2   |
| Up | GBP2__NM_004120.3     | GBP2     | NM_4120.3    |
| Up | FBXO6__NM_018438.4    | FBXO6    | NM_18438.4   |
| Up | IFITM1__NM_003641.2   | IFITM1   | NM_3641.2    |
| Up | STAT2__NM_005419.2    | STAT2    | NM_5419.2    |
| Up | TAP1__NM_000593.5     | TAP1     | NM_593.5     |
| Up | GBP4__NM_052941.2     | GBP4     | NM_52941.2   |
| Up | GBP5__NM_052942.2     | GBP5     | NM_52942.2   |
| Up | GBP1__NM_002053.1     | GBP1     | NM_2053.1    |
| Up | UBE2L6__NM_004223.3   | UBE2L6   | NM_4223.3    |
| Up | STAT1__NM_139266.1    | STAT1    | NM_139266.1  |
| Up | STAT1__NM_007315.2    | STAT1    | NM_7315.2    |
| Up | EPSTI1__NM_033255.2   | EPSTI1   | NM_33255.2   |
| Up | ADAR__NM_015840.2     | ADAR     | NM_15840.2   |
| Up | FTSJD2__NM_015050.2   | FTSJD2   | NM_15050.2   |
| Up | LGP2__NM_024119.1     | LGP2     | NM_24119.1   |
| Up | SP110__NM_004510.2    | SP110    | NM_4510.2    |
| Up | PARP9__NM_031458.1    | PARP9    | NM_31458.1   |
| Up | LY6E__NM_002346.1     | LY6E     | NM_2346.1    |
| Up | IFI6__NM_022872.2     | IFI6     | NM_22872.2   |
| Up | G1P3__NM_002038.2     | G1P3     | NM_2038.2    |
| Up | IFIT5__NM_012420.1    | IFIT5    | NM_12420.1   |
| Up | ISG20__NM_002201.4    | ISG20    | NM_2201.4    |
| Up | RTP4__NM_022147.2     | RTP4     | NM_22147.2   |
| Up | IFI35__NM_005533.2    | IFI35    | NM_5533.2    |
| Up | TRIM22__NM_006074.2   | TRIM22   | NM_6074.2    |
| Up | FLJ20035__NM_017631.3 | FLJ20035 | NM_17631.3   |
| Up | PARP12__NM_022750.2   | PARP12   | NM_22750.2   |
| Up | SAMD9L__NM_152703.2   | SAMD9L   | NM_152703.2  |
| Up | XAF1__NM_199139.1     | XAF1     | NM_199139.1  |
| Up | PHF11__NM_001040443.1 | PHF11    | NM_1040443.1 |
| Up | PHF11__NM_016119.1    | PHF11    | NM_16119.1   |
| Up | HERC6__NM_001013005.1 | HERC6    | NM_1013005.1 |
| Up | IFI44L__NM_006820.1   | IFI44L   | NM_6820.1    |
| Up | IFI44__NM_006417.2    | IFI44    | NM_6417.2    |
| Up | EIF2AK2__NM_002759.1  | EIF2AK2  | NM_2759.1    |
| Up | IFIT3__NM_001031683.1 | IFIT3    | NM_1031683.1 |
| Up | IRF7__NM_004029.2     | IRF7     | NM_4029.2    |
| Up | OAS3__NM_006187.2     | OAS3     | NM_6187.2    |

|    |                      |         |              |
|----|----------------------|---------|--------------|
| Up | IFIH1__NM_022168.2   | IFIH1   | NM_22168.2   |
| Up | IRF7__NM_004030.1    | IRF7    | NM_4030.1    |
| Up | PRIC285__NM_033405.2 | PRIC285 | NM_33405.2   |
| Up | MX1__NM_002462.2     | MX1     | NM_2462.2    |
| Up | RSAD2__NM_080657.3   | RSAD2   | NM_80657.3   |
| Up | IFIT3__NM_001549.2   | IFIT3   | NM_1549.2    |
| Up | OAS1__NM_001032409.1 | OAS1    | NM_1032409.1 |
| Up | IFIT2__NM_001547.3   | IFIT2   | NM_1547.3    |
| Up | ISG15__NM_005101.1   | ISG15   | NM_5101.1    |
| Up | OAS2__NM_016817.2    | OAS2    | NM_16817.2   |
| Up | HERC5__NM_016323.1   | HERC5   | NM_16323.1   |
| Up | OAS2__NM_002535.2    | OAS2    | NM_2535.2    |

**Supplementary Table S2** Enrichment analysis for the 101-transcript *Candida*-response signature

| #  | MetaGO_GeneGO_Process_Networks                 | Enrichment p-value |
|----|------------------------------------------------|--------------------|
| 1  | Interferon signaling                           | 3.82E-35           |
| 2  | Innate immune response to RNA viral infection  | 1.25E-12           |
| 3  | Inflammasome                                   | 2.50E-06           |
| 4  | Jak-STAT Pathway                               | 1.52E-05           |
| 5  | IFN-gamma signaling                            | 2.39E-05           |
| 6  | NK cell cytotoxicity                           | 3.00E-04           |
| 7  | Death Domain receptors & caspases in apoptosis | 2.87E-03           |
| 8  | Negative regulation of cell proliferation      | 3.21E-03           |
| 9  | Chemotaxis                                     | 4.56E-03           |
| 10 | Antigen presentation                           | 4.62E-03           |
| 11 | IL-10 anti-inflammatory response               | 4.98E-03           |
| 12 | IL-12,15,18 signaling                          | 1.15E-02           |
| 13 | Leucocyte chemotaxis                           | 2.33E-02           |
| 14 | T helper cell differentiation                  | 2.57E-02           |
| 15 | Lymphocyte proliferation                       | 2.60E-02           |
| 16 | Apoptotic nucleus                              | 3.76E-02           |
| 17 | Glycoconjugates                                | 4.22E-02           |
| 18 | Proteolysis in cell cycle and apoptosis        | 7.76E-02           |

**Supplementary Table S3** shows the number of tag-SNPs tested in each locus for case-control and cytokine correlation analyses

| <b>Case-control analysis</b> |                           |              |                 |                 |                       |                                                     |
|------------------------------|---------------------------|--------------|-----------------|-----------------|-----------------------|-----------------------------------------------------|
| <b>Number of cases</b>       | <b>Number of controls</b> | <b>Locus</b> | <b>Tag-SNPs</b> | <b>Top SNP</b>  | <b>P_logistic</b>     | <b>Bonferroni threshold-P (0.05/number of SNPs)</b> |
| 217                          | 12,068                    | CCL8-CCL13   | 40              | 1kg_17_29697448 | 0.00069* <sup>§</sup> | 0.0012                                              |
| 217                          | 12,068                    | STAT1        | 77              | imm_2_191584314 | 0.0042 <sup>§</sup>   | 0.00064                                             |
| 217                          | 12,068                    | SP110-140    | 75              | imm_2_230863948 | 0.012                 | 0.00066                                             |
| 217                          | 12,068                    | PSMB8-9      | 38              | rs3198005       | 0.019                 | 0.0013                                              |

| <b>Cytokine levels vs. SNP genotypes</b> |              |                 |                               |                                 |                                                     |
|------------------------------------------|--------------|-----------------|-------------------------------|---------------------------------|-----------------------------------------------------|
| <b>Number of controls</b>                | <b>Locus</b> | <b>Tag-SNPs</b> | <b>Top SNP</b>                | <b>Wilcoxon-Rank sum test P</b> | <b>Bonferroni threshold-P (0.05/number of SNPs)</b> |
| 74                                       | STAT1        | 77              | rs2280234 vs TNF-alpha levels | 0.001 <sup>§</sup>              | 0.00064                                             |
| 74                                       | STAT1        | 77              | rs4511150 vs IL-6 levels      | 0.00026* <sup>§</sup>           | 0.00064                                             |
| 74                                       | IRF1         | 35              | rs2548997 vs TNF-alpha levels | 0.0028 <sup>§</sup>             | 0.0014                                              |
| 74                                       | IRF1         | 35              | rs1124211 vs IL-10 levels     | 0.0024 <sup>§</sup>             | 0.0014                                              |

\* Clear the Bonferroni correction for multiple testing if we correct for number of SNPs tested in each locus.

<sup>§</sup> Clear the Bonferroni correction for multiple testing if we correct for number of genes tested (0.05/11genes; P < 0.0045).

1kg\_17\_29697448 indicates the location of SNP on chromosome 17 at position 29697448 (hg18)

**Supplementary Table S4** GO term enrichment of 27 differentially expressed genes for *Candida albicans* response in patients vs. controls.

| GO Term                                                          | Genes                                                                                                                                                                         | Gene Count | Frequency | PValue   | Bonferroni  |
|------------------------------------------------------------------|-------------------------------------------------------------------------------------------------------------------------------------------------------------------------------|------------|-----------|----------|-------------|
| Antiviral defense                                                | IFIH1, ISG15, IRF7, IFNG, RSAD2, MX1, EIF2AK2, TRIM22, STAT2                                                                                                                  | 9          | 33.3      | 1.09E-14 | 7.62E-13    |
| GO:0009615~response to virus                                     | IFIH1, ISG15, IRF7, IFNG, RSAD2, IFI44, MX1, EIF2AK2, TRIM22, STAT2                                                                                                           | 10         | 37.0      | 1.59E-14 | 5.77E-12    |
| GO:0006955~immune response                                       | IFIH1, TNFSF10, IFNG, OAS3, RSAD2, OAS1, OAS2, TRIM22, DHX58                                                                                                                  | 9          | 33.3      | 3.21E-06 | 0.00115691  |
| GO:0003723~RNA binding                                           | IFIH1, OAS3, OAS1, PRIC285, OAS2, EIF2AK2, DHX58, ZBP1, ADAR                                                                                                                  | 9          | 33.3      | 5.85E-06 | 3.86E-04    |
| IPR018952:2'-5'-oligoadenylate synthetase 1, domain 2/C-terminal | OAS3, OAS1, OAS2                                                                                                                                                              | 3          | 11.1      | 1.19E-05 | 8.34E-04    |
| IPR006117:2-5-oligoadenylate synthetase, conserved site          | OAS3, OAS1, OAS2                                                                                                                                                              | 3          | 11.1      | 1.19E-05 | 8.34E-04    |
| IPR006116:2-5-oligoadenylate synthetase, ubiquitin-like region   | OAS3, OAS1, OAS2                                                                                                                                                              | 3          | 11.1      | 1.98E-05 | 0.00138778  |
| host-virus interaction                                           | IFIH1, ISG15, IRF7, EIF2AK2, TRIM22, STAT2                                                                                                                                    | 6          | 22.2      | 3.51E-05 | 0.002456665 |
| rna-binding                                                      | IFIH1, OAS3, OAS1, OAS2, EIF2AK2, DHX58, ADAR                                                                                                                                 | 7          | 25.9      | 6.79E-05 | 0.004742343 |
| hsa04622:RIG-I-like receptor signaling pathway                   | IFIH1, ISG15, IRF7, DHX58                                                                                                                                                     | 4          | 14.8      | 1.39E-04 | 0.002221087 |
| polymorphism                                                     | IFIH1, RTP4, OAS3, RSAD2, OAS1, FAM46A, SAMD9L, ISG15, IFNG, XAF1, MX1, DHX58, ZBP1, HERC6, HERC5, IFI44, TRIM22, STAT2, IFIT2, TNFSF10, PARP12, IRF7, PRIC285, EIF2AK2, ADAR | 25         | 92.6      | 2.80E-04 | 0.019428562 |

**Supplementary Table S4** GO term enrichment of 27 differentially expressed genes for *Candida albicans* response in patients vs. controls.

Shown are significantly enriched GO terms ordered for p-value
